# Supplementary material for: Efficacy of species-specific protein antibiotics in a murine model of acute Pseudomonas aeruginosa lung infection
Source: PubMed Central journal article supplement (PMC4957109; doi:10.1038/srep30201), 2016-07-22
Supplement: srep30201-s1.pdf [file srep30201-s1.pdf]

**Efficacy of species-specific protein antibiotics in a murine model of acute *Pseudomonas aeruginosa* lung infection**

Laura C. McCaughey, Neil. D. Ritchie, Gillian R. Douce, Thomas J. Evans, Daniel Walker

## Supplementary information

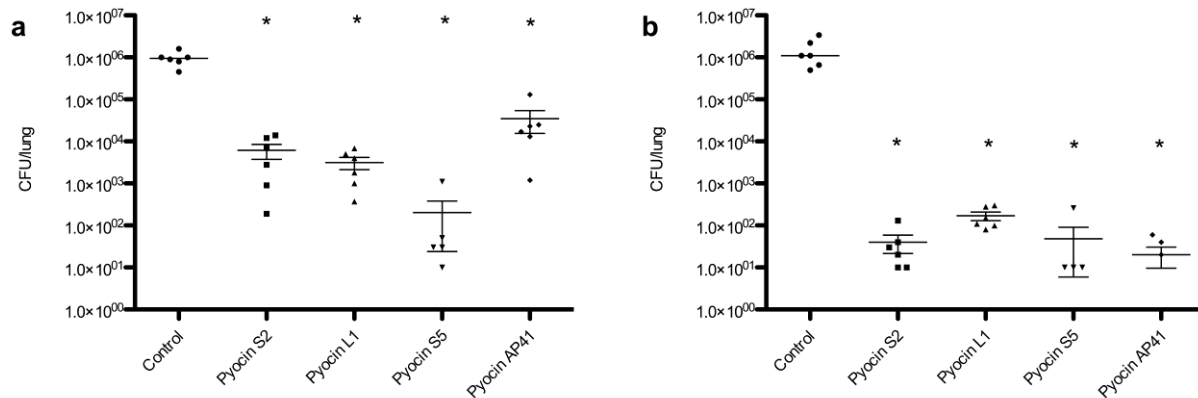

**Figure S1. Biological repeats of experiments in Figures 2 (c) and (d).** *P. aeruginosa* P8 bacterial recovery from pyocin treated mice. All mice were given 75  $\mu\text{g}$  of pyocin. Bacterial counts were determined by CFU counts of homogenised lungs. (a) Mice treated with pyocin 1 h post-infection, all mice culled 4.5 h post-infection. (b) Mice treated with pyocin 1 h post-infection, pyocin treated mice survived to 24 h. Bars represent Mean  $\pm$  SEM. \* denotes statistical significance for comparison of treatment versus control by a one-sided Mann-Whitney U test with Bonferroni correction applied.

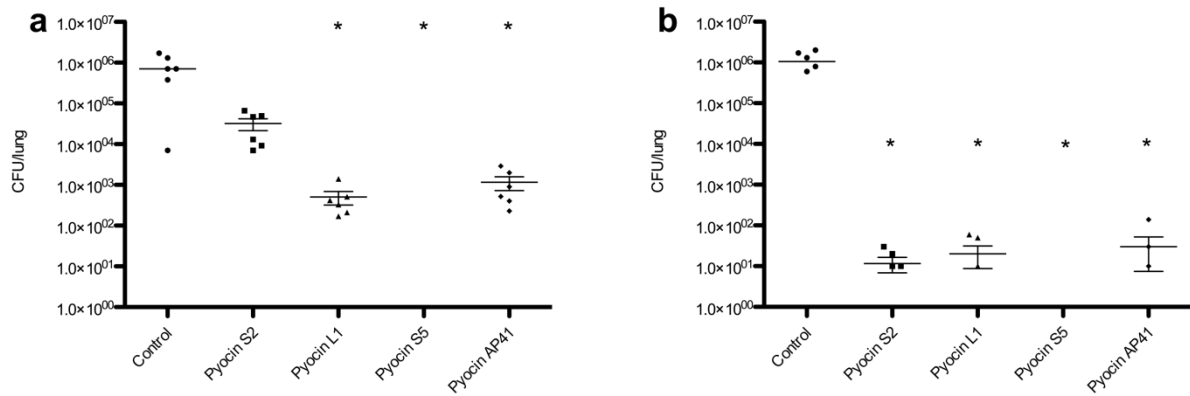

**Figure S2. *P. aeruginosa* P8 bacterial recovery from pyocin treated mice.** All mice were given 75  $\mu$ g of pyocin. Bacterial counts were determined by CFU counts of homogenised lungs. (a) Mice treated with pyocin 6 h pre-infection, all mice culled 4 h post-infection. (b) Mice treated with pyocin 6 h pre-infection, pyocin treated mice survived to 24 h. No colonies were recovered from pyocin S5 treated mice in a) and b). Bars represent Mean  $\pm$  SEM. \* denotes statistical significance for comparison of treatment versus control by a one-sided Mann-Whitney U test with Bonferroni correction applied.

| Treatment    | Infecting <i>P. aeruginosa</i> strain |                              |                                |
|--------------|---------------------------------------|------------------------------|--------------------------------|
|              | P5                                    | P17                          | E2                             |
| No treatment | 1.7x10 <sup>5</sup> CFU/lung          | 4.4x10 <sup>5</sup> CFU/lung | 1.5x10 <sup>5</sup> CFU/lung   |
| Pyocin L1    | 40                                    | X                            | No colonies detected           |
| Pyocin S2    | X                                     | No colonies detected         | X                              |
| Pyocin AP41  | No colonies detected                  | No colonies detected *       | 1.3x10 <sup>4</sup> CFU/lung * |
| Pyocin S5    | No colonies detected                  | No colonies detected         | No colonies detected           |

**Table S1. Bacterial counts for pyocin treated *P. aeruginosa* isolates.** Mice were infected with a lethal dose of *P. aeruginosa*. Untreated mice were culled 4 h - 5.5 h post infection. Pyocin treated mice (75 µg) survived to 24 h. \*Mice culled at same time as control. \*1 mouse coughed up pyocin AP41 treatment and was culled at 4 h post-infection (bacterial count 1.3x10<sup>5</sup> CFU/lung). X - Pyocin was not used against this strain.

| Treatment   | Lowest active dose tested | Corresponding molarity |
|-------------|---------------------------|------------------------|
| Pyocin L1   | 750 ng                    | 1.06 µM                |
| Pyocin S2   | 750 ng                    | 358 nM                 |
| Pyocin AP41 | 750 ng                    | 319 nM                 |
| Pyocin S5   | 750 pg                    | 535 pM                 |
| Tobramycin  | 7.5 µg                    | 641 µM                 |

**Table S2. Minimum dose of pyocin tested that affords protection against *P. aeruginosa* P8 infection.** The lowest active dose tested represents the lowest dose tested with which the treated mice survived to 24 h.
